# Supplementary material
Source: PubMed Central journal article supplement (PMC2823897)
Supplement: 0915001107_pnas.200915001SI.pdf [file 0915001107_pnas.200915001SI.pdf]

# Supporting Information

De Smet et al. 10.1073/pnas.0915001107

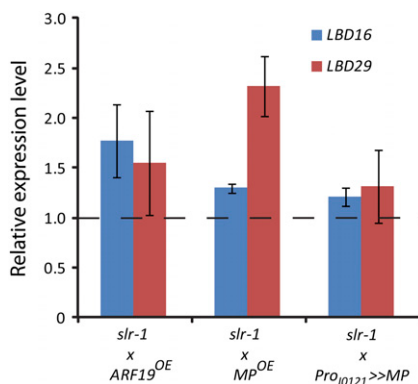

**Fig. S1.** Quantitative RT-PCR expression analysis of *LBD16* and *LBD29* in *slr-1*x*ARF19*<sup>OE</sup>, *slr-1*x*Pro*<sub>J0121</sub>>>*MP* and *slr-1*x*MP*<sup>OE</sup> (roots from seedlings 10 days after germination, segregating F2 population) compared with the control expression level (dashed line). Data are mean  $\pm$  SEM of different independent crosses ( $n \geq 2$ ). No statistically significant differences for values compared with control or with the other transgenic lines as determined by Student's *t* test ( $P < 0.05$ ). The following primers were used to quantify the gene expression levels: *LBD16*, 5'-AGCCGCCGGAGATCTAAGACA-3'/5'-CACTAGTTTGTGCCACGTCATAAAC-3'; *LBD29*, 5'-GAAGTTCTGGGACGGTTCAACAC-3'/5'-GGTTTCGTTGTGTAAGTACTCTCTG-3'.
